# Supplementary material for: The Novel Role of SOX2 as an Early Predictor of Cancer Risk in Patients with Laryngeal Precancerous Lesions
Source: PubMed Central journal article supplement (PMC6468607; doi:10.3390/cancers11030286), 2019-03-01
Supplement: cancers-11-00286-s001.pdf [file cancers-11-00286-s001.pdf]

# Supplementary Materials: Novel Role of Sox2 as Early Predictor of Cancer Risk in Patients with Laryngeal Precancerous Lesions

Rocío Granda-Díaz, Sofía T. Menéndez, Daniel Pedregal Mallo, Francisco Hermida-Prado, René Rodríguez, Laura Suárez-Fernández, Aitana Vallina, Mario Sánchez-Canteli, Aida Rodríguez, M. Soledad Fernández-García, Juan P. Rodrigo and Juana M. García-Pedrero

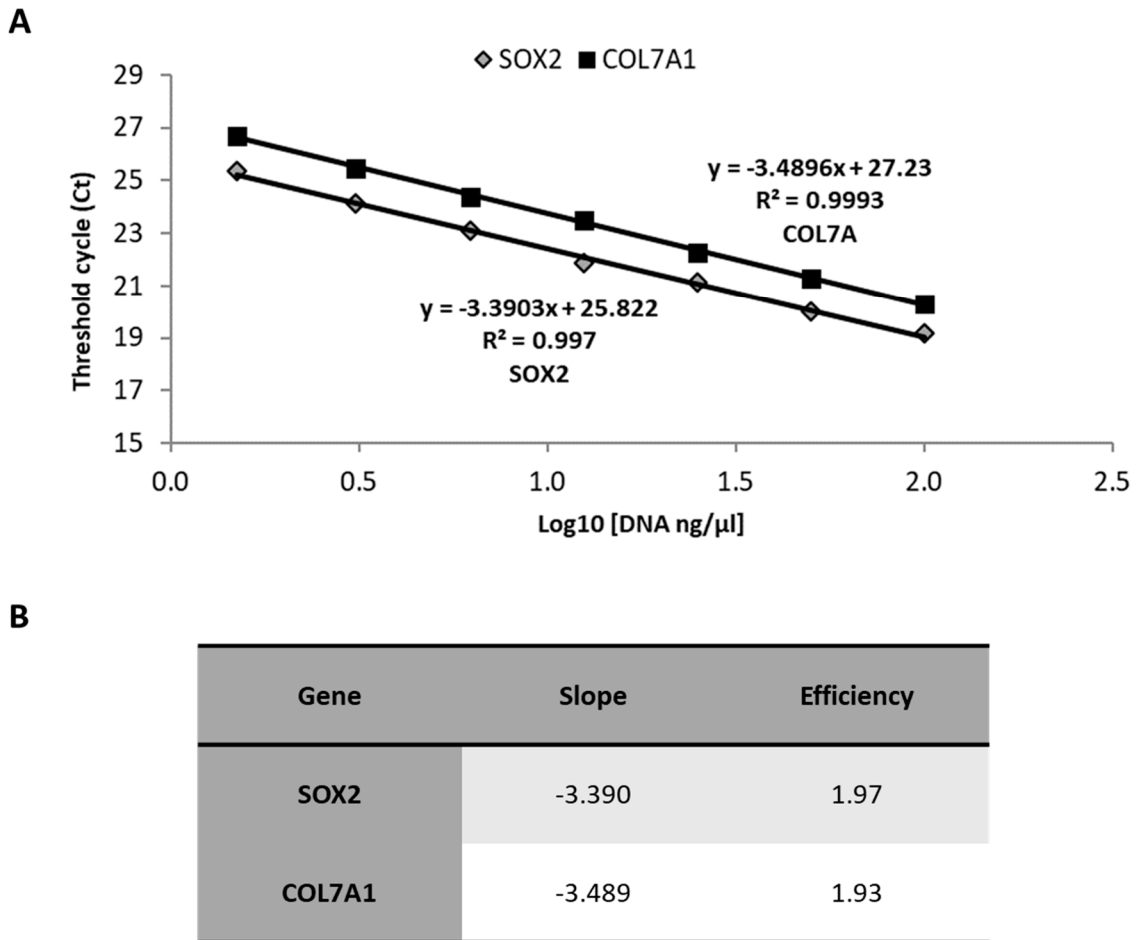

**Figure S1.** Standard curve showing the Log10 DNA amount, in ng per μL, plotted against threshold cycle (Ct) for different dilutions of genomic DNA in PCR-grade water by real-time PCR (A). The table shows the efficiency of amplification for each primer pair, calculated using the slope of the corresponding standard curve (B).

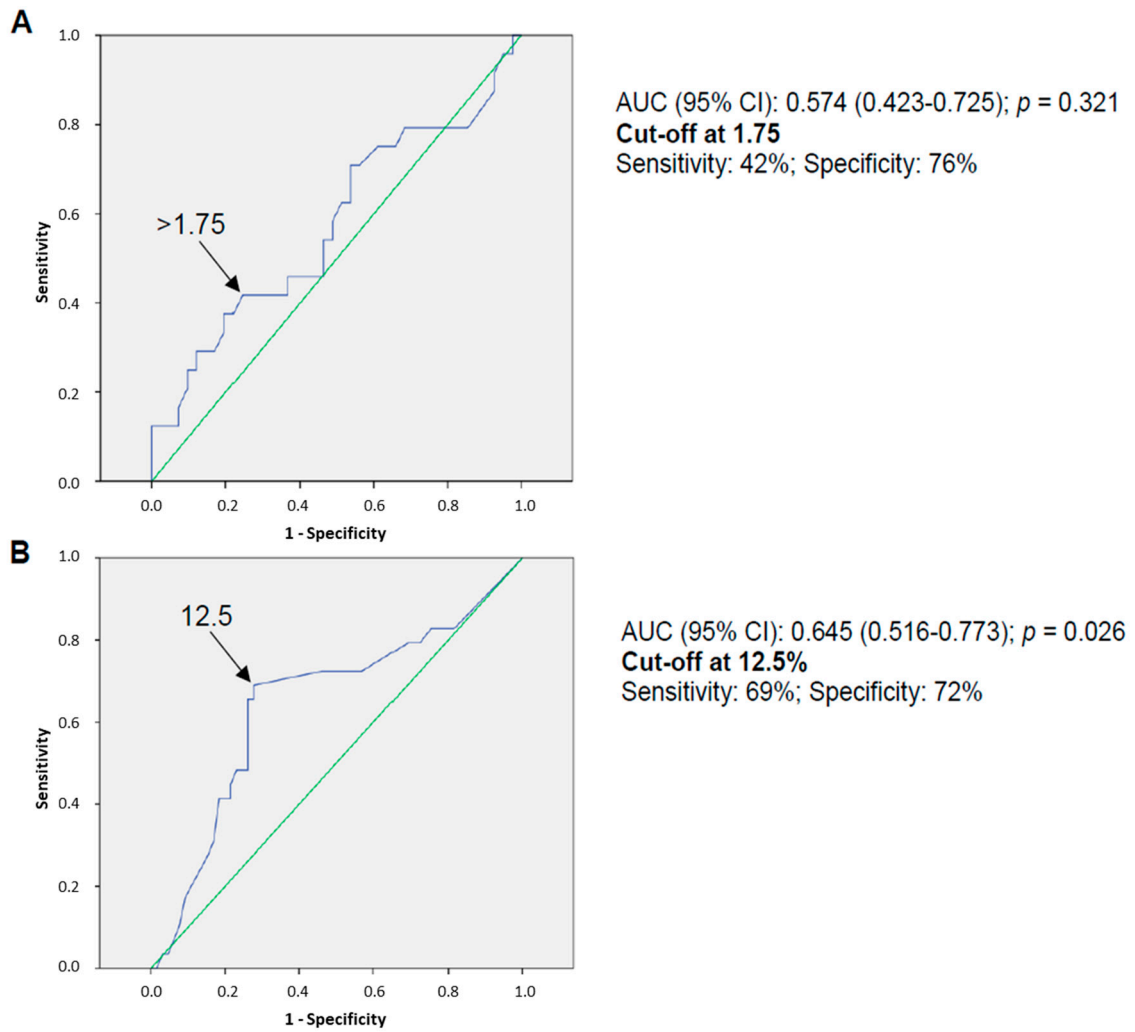

**Figure S2.** Determination of the optimal cut-off values for SOX2 amplification and SOX2 expression by receiver operating characteristic (ROC) curve analysis. ROC curves for SOX2 amplification (**A**) and SOX2 expression (**B**) (as percentage of positive nuclei). The optimal cut-off values calculated were 1.75 for SOX2 amplification and 12.5% for SOX2 expression. The area under de curve (AUC), with 95%CI, the  $p$  values, and the sensitivity and specificity calculated for each optimal cut-off are shown.

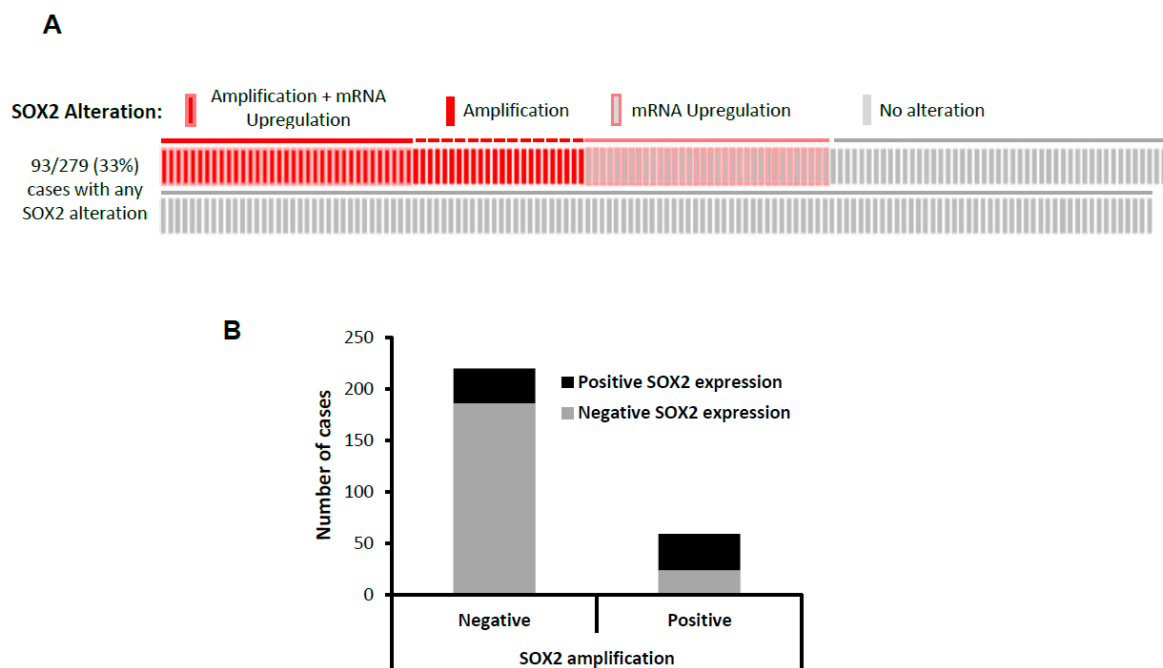

**Figure S3.** Analysis of *SOX2* gene amplification and mRNA expression from the TCGA cohort of 279 HNSCC patients [44] using cBioPortal [45]. Schematic representation (A) showing the number of cases with gene amplification and/or mRNA upregulation or no alteration. Correlations between *SOX2* expression and gene amplification in this cohort (B).

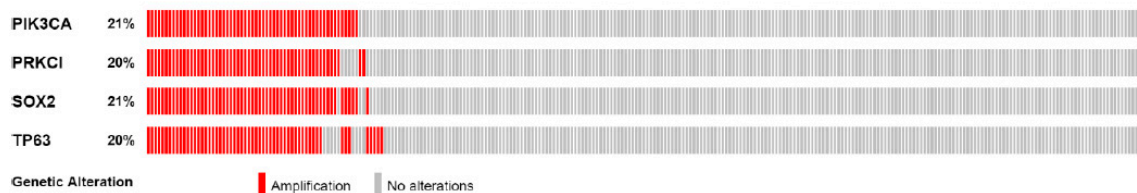

**Figure S4.** Gene amplification analysis of *SOX2* and other driver genes (*PIK3CA*, *PRKCI* and *TP63*) mapping at 3q26 amplicon using the TCGA cohort of 279 HNSCC patients [44] and the platform cBioPortal [45]. Oncoprint illustrates frequent co-amplification of all these genes.
